# Supplementary material for: Adapting an Atmospheric Dispersion Model to Assess the Risk of Windborne Transmission of Porcine Reproductive and Respiratory Syndrome Virus between Swine Farms
Source: MDPI journal article supplement (doi:10.3390/v14081658), 2022-07-28
Supplement: s1 [file s1]

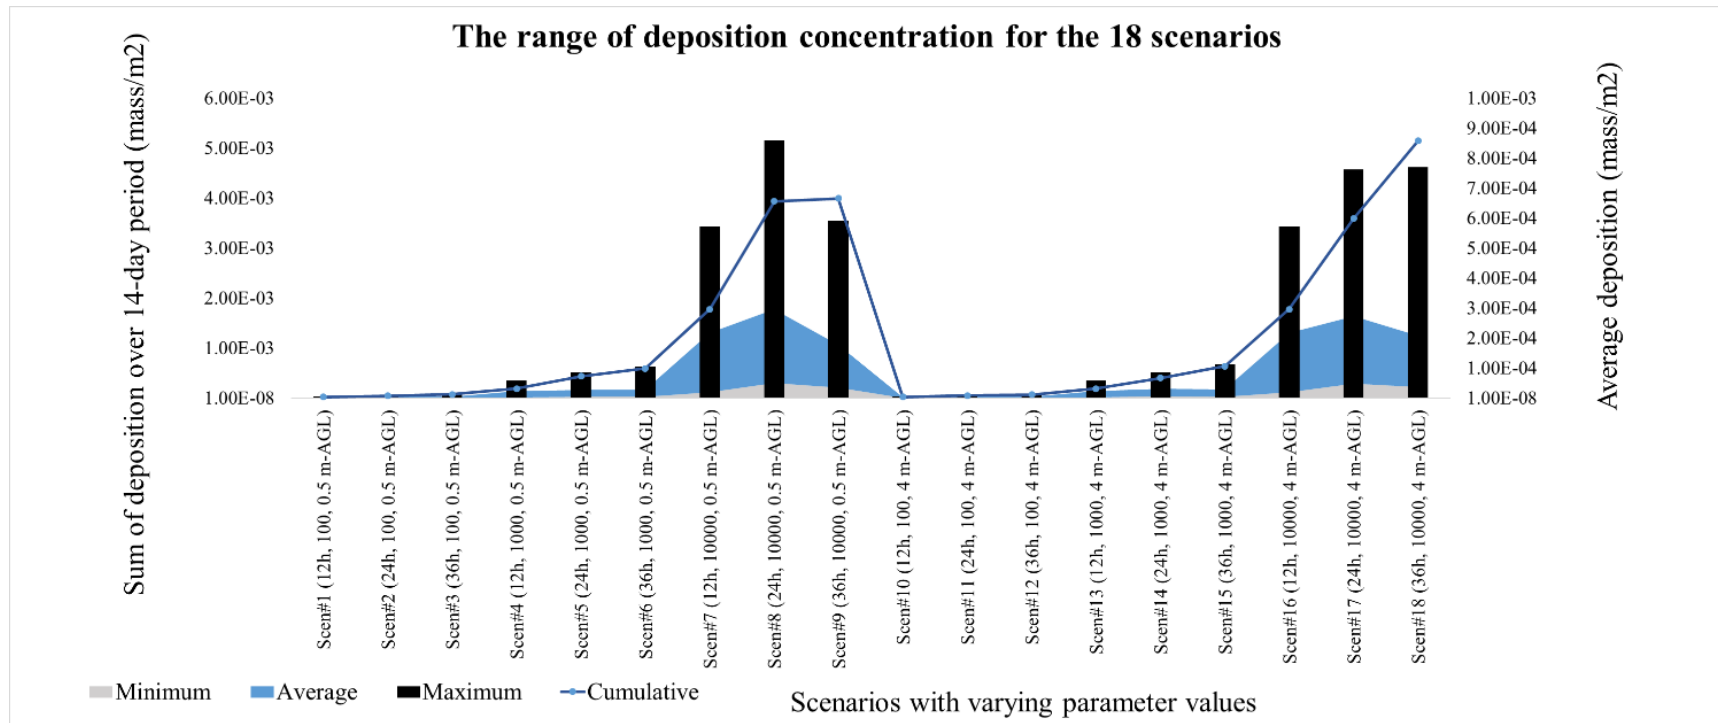

**Figure S1. The range of deposition values resulted from the 18 scenarios with independently varying input parameter values.** This excludes the emitting farms. The parameters combinations included 1) emission quantity, i.e. the particle concentration at source farms (n=3; 100, 1000, 10000 particles), 2) model duration which is a proxy for pathogen survival (n=3; 12h, 24h, 36h), and 3) takeoff/emission height (n=2; 0.5 and 4 m-AGL). This summarization depicts the optimum parameter combinations that results in highest deposition on the terrain.
